CORRECTION

# Correction: Efficacy of Peer Education for Adopting Preventive Behaviors against Head Lice Infestation in Female Elementary School Students: A Randomised Controlled Trial

Mahdi Moshki, Fereshteh Zamani-Alavijeh, Mehdi Mojadam

There is an error in affiliation 3 for the author Mehdi Mojadam. Affiliation 3 should be: Public Health Department, School of Health, Ahvaz Jundishapur University of Medical Sciences, Ahvaz, Iran.

## Reference

1. Moshki M, Zamani-Alavijeh F, Mojadam M (2017) Efficacy of Peer Education for Adopting Preventive Behaviors against Head Lice Infestation in Female Elementary School Students: A Randomised Controlled Trial. PLoS ONE 12(1): e0169361. <https://doi.org/10.1371/journal.pone.0169361> PMID: 28072852

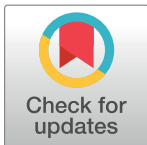

## OPEN ACCESS

**Citation:** Moshki M, Zamani-Alavijeh F, Mojadam M (2017) Correction: Efficacy of Peer Education for Adopting Preventive Behaviors against Head Lice Infestation in Female Elementary School Students: A Randomised Controlled Trial. PLoS ONE 12(9): e0185299. <https://doi.org/10.1371/journal.pone.0185299>

**Published:** September 19, 2017

**Copyright:** © 2017 Moshki et al. This is an open access article distributed under the terms of the [Creative Commons Attribution License](https://creativecommons.org/licenses/by/4.0/), which permits unrestricted use, distribution, and reproduction in any medium, provided the original author and source are credited.
